# Supplementary material for: Combining Microfinance and Health in Reducing Poverty-Driven Healthcare Costs: Evidence From the Philippines
Source: Frontiers journal article supplement (doi:10.3389/fpubh.2020.583455), 2020-10-08
Supplement: Data_Sheet_1.PDF [file Data_Sheet_1.PDF]

## Supplemental data extracted from the BMPC Annual Reports

(Request granted to copy the provisions in following figures and table table from the BMPC annual reports)

*Total number of BMPC members from 2013 – 2018<sup>1</sup>*

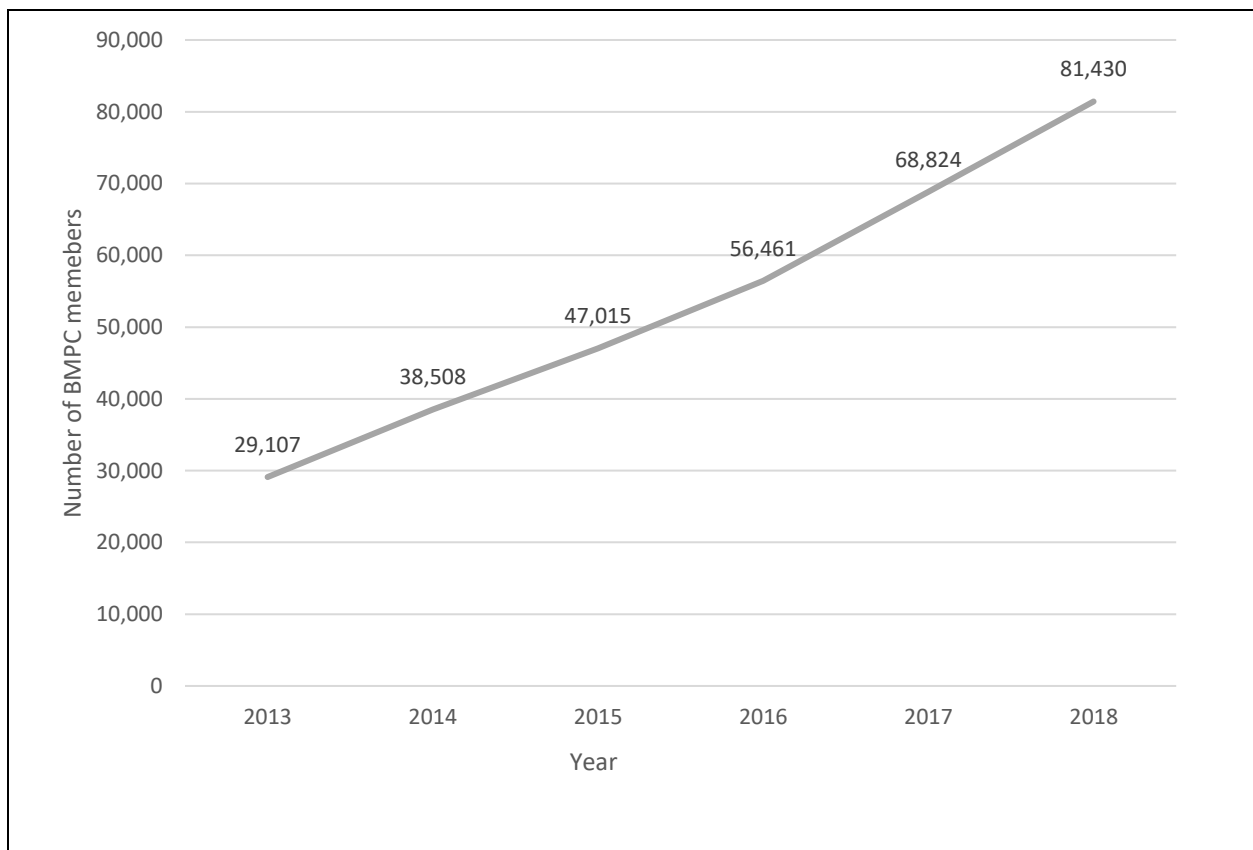

---

<sup>1</sup> Source of data: BMPC 2018 Annual Report

*BMPC percentage distribution of members by branch*

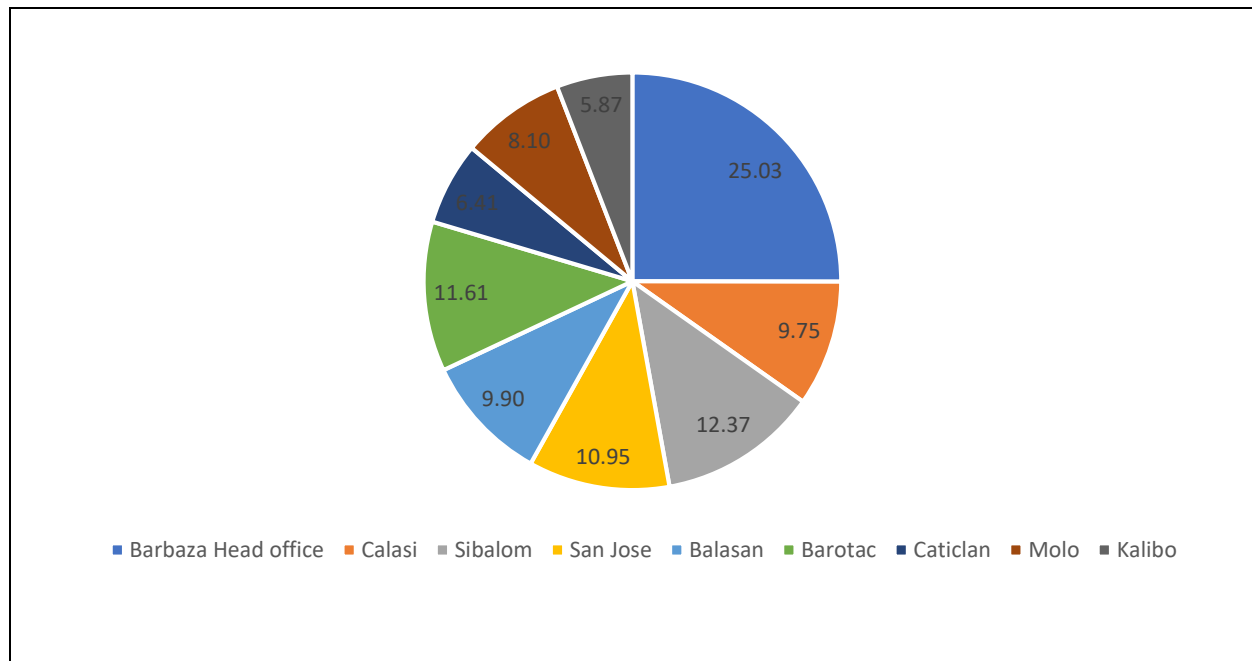

*BMPC medical fund allocation in 2015 – 2018*

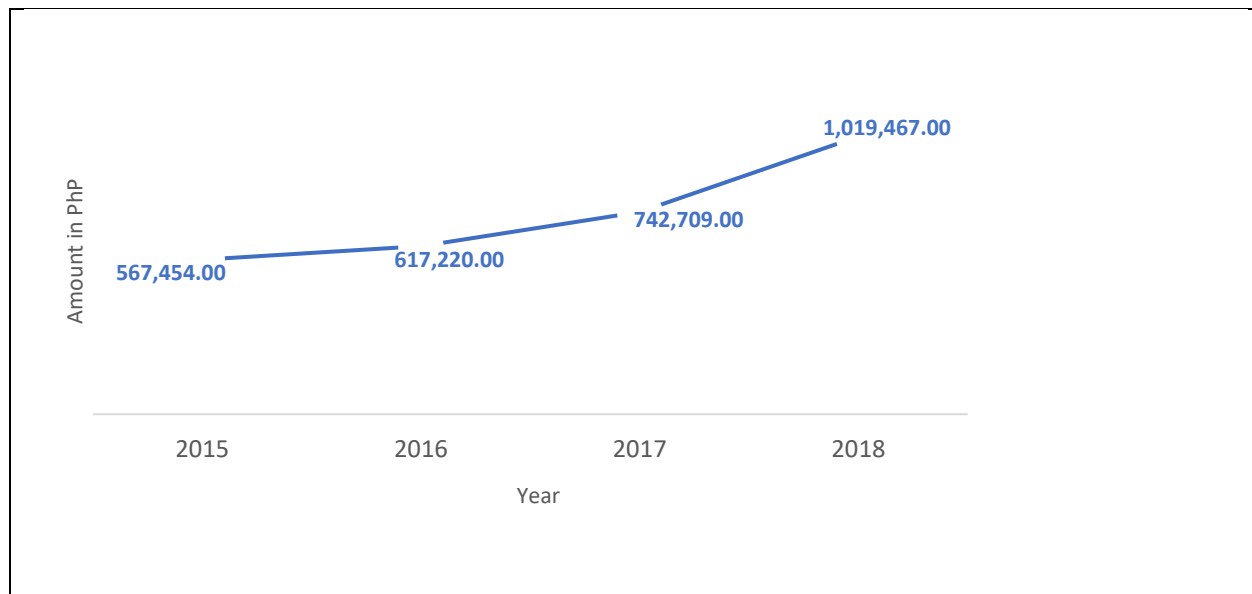

*Percentage of BMPC members per branch who took up a medical loan from 2016 – 2018*

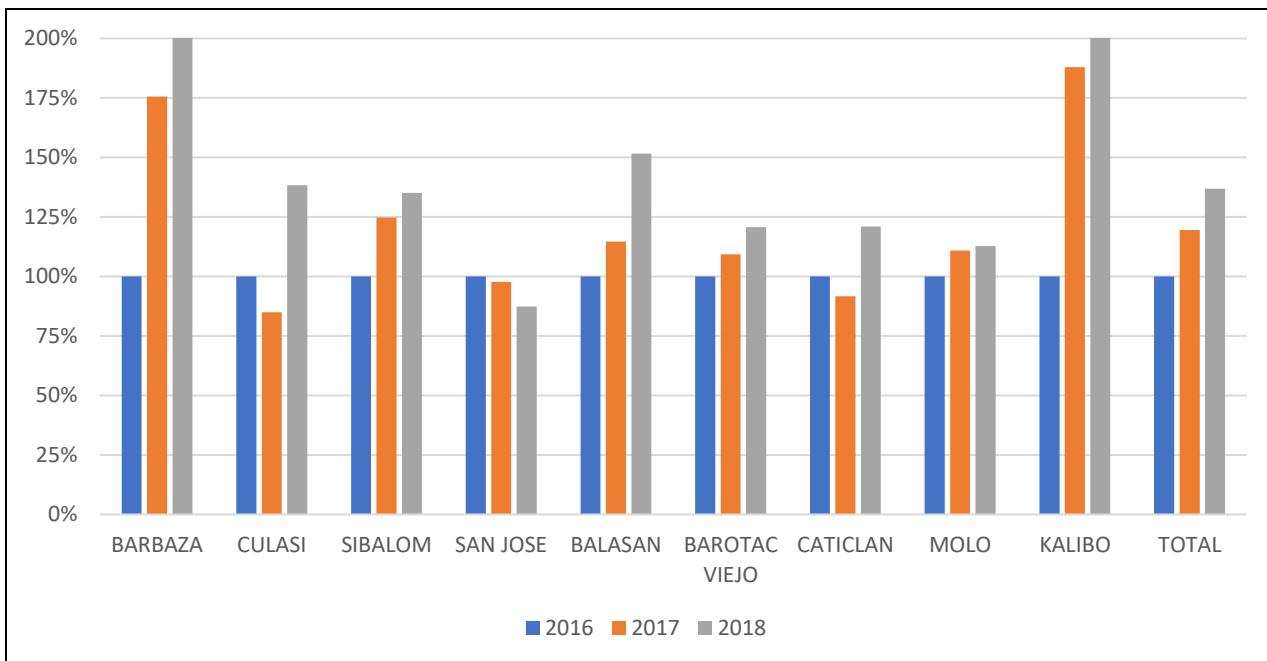

*Total number of BMPC members and medical loan borrowers in 2016-2018*

|                         | 2016          | 2017          | 2018          |
|-------------------------|---------------|---------------|---------------|
| Number of borrowers     | 3504 (6.2%)   | 4188 (6.1%)   | 4793 (5.9%)   |
| Total number of members | <b>56,461</b> | <b>68,824</b> | <b>81,430</b> |

*Number and percentage of BMPC members per category by branch in 2019*

| Branch              | Segmentation Criteria |       |      |       |            |       |                  |        |                                        |
|---------------------|-----------------------|-------|------|-------|------------|-------|------------------|--------|----------------------------------------|
|                     | Category A            |       |      |       | Category B |       |                  |        | Total number of members in each branch |
|                     | Silver                |       | Gold |       | Diamond    |       | Brass and Bronze |        |                                        |
| BARBAZA MAIN OFFICE | 143                   | 0.70% | 248  | 1.22% | 187        | 0.92% | 1980<br>2        | 97.16% | 20380                                  |
| CULASI              | 58                    | 0.73% | 121  | 1.52% | 46         | 0.58% | 7715             | 97.17% | 7940                                   |
| SIBALOM             | 43                    | 0.43% | 71   | 0.70% | 33         | 0.33% | 9928             | 98.54% | 10075                                  |
| SAN JOSE            | 82                    | 0.92% | 81   | 0.91% | 50         | 0.56% | 8705             | 97.61% | 8918                                   |
| BALASAN             | 68                    | 0.85% | 89   | 1.11% | 58         | 0.72% | 7801             | 97.32% | 8016                                   |
| BAROTAC VIEJO       | 94                    | 0.99% | 56   | 0.59% | 17         | 0.18% | 9287             | 98.23% | 9454                                   |
| CATICLAN            | 50                    | 0.96% | 76   | 1.46% | 21         | 0.40% | 5076             | 97.19% | 5223                                   |
| MOLO                | 68                    | 1.03% | 61   | 0.92% | 0          | 0.00% | 6466             | 98.04% | 6595                                   |
| KALIBO              | 99                    | 2.07% | 0    | 0.00% | 0          | 0.00% | 4685             | 97.93% | 4784                                   |
| Total               | 705                   | 0.84% | 803  | 0.95% | 412        | 0.49% | 82510            | 97.73% | 84430                                  |
